# Supplementary material for: Antibiotic Susceptibility, Virulome, and Clinical Outcomes in European Infants with Bloodstream Infections Caused by Enterobacterales
Source: MDPI journal article supplement (doi:10.3390/antibiotics10060706), 2021-06-11
Supplement: s1 [file s1]

**Supplementary Table 1: Isolate-specific accession numbers**

| Isolate code | Species                      | Study    | Country | Date of sample | Accession number |
|--------------|------------------------------|----------|---------|----------------|------------------|
| econeo_1     | <i>Escherichia coli</i>      | CLAHRC   | UK      | 06/06/2015     | ERS6404384       |
| econeo_2     | <i>Escherichia coli</i>      | CLAHRC   | UK      | 15/03/2015     | ERS6404385       |
| econeo_3     | <i>Escherichia coli</i>      | CLAHRC   | UK      | 12/03/2015     | ERS6404326       |
| koxneo_4     | <i>Klebsiella oxytoca</i>    | CLAHRC   | UK      | 22/02/2015     | ERS6404327       |
| econeo_5     | <i>Escherichia coli</i>      | CLAHRC   | UK      | 18/03/2015     | ERS6404328       |
| slineo_6     | <i>Serratia liquefaciens</i> | CLAHRC   | UK      | 25/02/2015     | ERS6404334       |
| econeo_7     | <i>Escherichia coli</i>      | CLAHRC   | UK      | 13/10/2014     | ERS6404337       |
| econeo_8     | <i>Escherichia coli</i>      | CLAHRC   | UK      | 28/10/2014     | ERS6404336       |
| econeo_9     | <i>Escherichia coli</i>      | CLAHRC   | UK      | 02/02/2015     | ERS6404333       |
| eclneo_10    | <i>Enterobacter cloacae</i>  | NEOMERO1 | Estonia | 04/09/2012     | ERS6404339       |
| eclneo_11    | <i>Enterobacter cloacae</i>  | NEOMERO1 | Estonia | 05/09/2012     | ERS6404329       |
| econeo_12    | <i>Escherichia coli</i>      | NEOMERO1 | Estonia | 26/09/2012     | ERS6404331       |
| easneo_13    | <i>Enterobacter asburiae</i> | NEOMERO1 | Estonia | 04/10/2012     | ERS6404330       |
| koxneo_14    | <i>Klebsiella oxytoca</i>    | NEOMERO1 | Estonia | 10/11/2012     | ERS6404332       |
| koxneo_15    | <i>Klebsiella oxytoca</i>    | NEOMERO1 | Estonia | 21/05/2013     | ERS6404338       |
| eclneo_16    | <i>Enterobacter cloacae</i>  | NEOMERO1 | Estonia | 31/07/2013     | ERS6404335       |
| koxneo_17    | <i>Klebsiella oxytoca</i>    | NEOMERO1 | Estonia | 01/09/2013     | ERS6404341       |
| eclneo_18    | <i>Enterobacter cloacae</i>  | NEOMERO1 | Estonia | 27/09/2013     | ERS6404340       |
| koxneo_19    | <i>Klebsiella oxytoca</i>    | NEOMERO1 | Estonia | 30/09/2013     | ERS6404345       |
| econeo_20    | <i>Escherichia coli</i>      | NEOMERO1 | Estonia | 20/01/2014     | ERS6404342       |
| easneo_21    | <i>Enterobacter asburiae</i> | NEOMERO1 | Estonia | 11/02/2014     | ERS6404346       |
| koxneo_22    | <i>Klebsiella oxytoca</i>    | NEOMERO1 | Estonia | 12/02/2014     | ERS6404343       |
| eclneo_23    | <i>Enterobacter cloacae</i>  | NEOMERO1 | Estonia | 27/04/2014     | ERS6404344       |
| eclneo_24    | <i>Enterobacter cloacae</i>  | NEOMERO1 | Estonia | 02/04/2013     | ERS6404359       |
| eclneo_25    | <i>Enterobacter cloacae</i>  | NEOMERO1 | Estonia | 22/07/2013     | ERS6404360       |
| eclneo_26    | <i>Enterobacter cloacae</i>  | NEOMERO1 | Estonia | 31/07/2013     | ERS6404357       |
| eclneo_27    | <i>Enterobacter cloacae</i>  | NEOMERO1 | Estonia | 23/08/2013     | ERS6404351       |
| pmineo_28    | <i>Proteus mirabilis</i>     | NEOMERO1 | Estonia | 26/03/2014     | ERS6404356       |
| kpnneo_29    | <i>Klebsiella pneumoniae</i> | NEOMERO1 | Estonia | 19/06/2014     | ERS6404350       |
| eclneo_30    | <i>Enterobacter cloacae</i>  | NEOMERO1 | Estonia | 01/11/2014     | ERS6404349       |

|           |                               |          |           |            |            |
|-----------|-------------------------------|----------|-----------|------------|------------|
| easneo_31 | <i>Enterobacter asburiae</i>  | NEOMERO1 | Spain     | 20/04/2013 | ERS6404352 |
| kpnneo_32 | <i>Klebsiella pneumoniae</i>  | NEOMERO1 | Greece    | 25/09/2013 | ERS6404348 |
| kpnneo_33 | <i>Klebsiella pneumoniae</i>  | NEOMERO1 | Greece    | 31/01/2014 | ERS6404362 |
| kpnneo_34 | <i>Klebsiella pneumoniae</i>  | NEOMERO1 | Greece    | 02/02/2014 | ERS6404358 |
| kpnneo_35 | <i>Klebsiella pneumoniae</i>  | NEOMERO1 | Greece    | 29/07/2014 | ERS6404363 |
| eclneo_36 | <i>Enterobacter cloacae</i>   | NEOMERO1 | Greece    | 22/08/2014 | ERS6404365 |
| eaeneo_37 | <i>Enterobacter aerogenes</i> | NEOMERO1 | Greece    | 02/09/2014 | ERS6404364 |
| kpnneo_38 | <i>Klebsiella pneumoniae</i>  | NEOMERO1 | Greece    | 10/09/2012 | ERS6404361 |
| econeo_39 | <i>Escherichia coli</i>       | NEOMERO1 | Italy     | 15/07/2013 | ERS6404374 |
| smaneo_40 | <i>Serratia marcescens</i>    | NEOMERO1 | Italy     | 24/07/2013 | ERS6404372 |
| econeo_41 | <i>Escherichia coli</i>       | NEOMERO1 | Italy     | 26/09/2013 | ERS6404379 |
| kpnneo_42 | <i>Klebsiella pneumoniae</i>  | NEOMERO1 | Italy     | 10/10/2013 | ERS6404380 |
| kpnneo_43 | <i>Klebsiella pneumoniae</i>  | NEOMERO1 | Italy     | 08/09/2013 | ERS6404376 |
| eaeneo_44 | <i>Enterobacter aerogenes</i> | NEOMERO1 | Italy     | 01/10/2013 | ERS6404367 |
| econeo_45 | <i>Escherichia coli</i>       | NEOMERO1 | Italy     | 15/02/2014 | ERS6404353 |
| econeo_46 | <i>Escherichia coli</i>       | NEOMERO1 | Lithuania | 29/11/2012 | ERS6404375 |
| kpnneo_47 | <i>Klebsiella pneumoniae</i>  | NEOMERO1 | Lithuania | 12/02/2014 | ERS6404368 |
| eclneo_48 | <i>Enterobacter cloacae</i>   | NEONIN   | UK        | 28/03/2014 | ERS6404370 |
| econeo_49 | <i>Escherichia coli</i>       | NEONIN   | UK        | 27/05/2014 | ERS6404371 |
| econeo_50 | <i>Escherichia coli</i>       | NEONIN   | UK        | 30/05/2014 | ERS6404373 |
| econeo_51 | <i>Escherichia coli</i>       | NEONIN   | UK        | 03/06/2014 | ERS6404366 |
| smaneo_52 | <i>Serratia marcescens</i>    | NEONIN   | UK        | 25/05/2014 | ERS6404378 |
| eclneo_53 | <i>Enterobacter cloacae</i>   | NEONIN   | UK        | 24/07/2014 | ERS6404354 |
| econeo_54 | <i>Escherichia coli</i>       | NEONIN   | UK        | 13/03/2014 | ERS6404377 |
| econeo_55 | <i>Escherichia coli</i>       | NEONIN   | UK        | 02/07/2014 | ERS6404383 |
| kpnneo_56 | <i>Klebsiella pneumoniae</i>  | NEONIN   | UK        | 04/04/2014 | ERS6404381 |
| eclneo_57 | <i>Enterobacter cloacae</i>   | NEONIN   | UK        | 17/08/2012 | ERS6404369 |
| econeo_58 | <i>Escherichia coli</i>       | NEONIN   | UK        | 26/11/2012 | ERS6404382 |
| ekoneo_59 | <i>Enterobacter kobei</i>     | NEONIN   | UK        | 25/08/2012 | ERS6404355 |
| econeo_60 | <i>Escherichia coli</i>       | NEONIN   | UK        | 09/11/2012 | ERS6404347 |
| eclneo_61 | <i>Enterobacter cloacae</i>   | NEONIN   | UK        | 18/02/2013 | ERS6404386 |
| smaneo_62 | <i>Serratia marcescens</i>    | NEONIN   | UK        | 19/02/2013 | ERS6404387 |
| smaneo_63 | <i>Serratia marcescens</i>    | NEONIN   | UK        | 18/03/2013 | ERS6404388 |

|           |                              |        |    |            |            |
|-----------|------------------------------|--------|----|------------|------------|
| koxneo_64 | <i>Klebsiella oxytoca</i>    | NEONIN | UK | 08/04/2013 | ERS6404390 |
| kpnneo_65 | <i>Klebsiella pneumoniae</i> | NEONIN | UK | 03/09/2013 | ERS6404391 |
| econeo_66 | <i>Escherichia coli</i>      | NEONIN | UK | 19/11/2013 | ERS6404389 |
| econeo_67 | <i>Escherichia coli</i>      | NEONIN | UK | 06/11/2013 | ERS6404392 |
| econeo_68 | <i>Escherichia coli</i>      | NEONIN | UK | 09/02/2010 | ERS6404400 |
| econeo_69 | <i>Escherichia coli</i>      | NEONIN | UK | 24/03/2010 | ERS6404398 |
| econeo_70 | <i>Escherichia coli</i>      | NEONIN | UK | 13/06/2010 | ERS6404394 |
| econeo_71 | <i>Escherichia coli</i>      | NEONIN | UK | 20/06/2010 | ERS6404395 |
| smaneo_72 | <i>Serratia marcescens</i>   | NEONIN | UK | 04/07/2010 | ERS6404396 |
| econeo_73 | <i>Escherichia coli</i>      | NEONIN | UK | 12/10/2010 | ERS6404397 |
| ecneo_74  | <i>Enterobacter cloacae</i>  | NEONIN | UK | 18/10/2010 | ERS6404393 |
| smaneo_75 | <i>Serratia marcescens</i>   | NEONIN | UK | 08/12/2010 | ERS6404401 |
| econeo_76 | <i>Escherichia coli</i>      | NEONIN | UK | 12/12/2010 | ERS6404399 |
| econeo_77 | <i>Escherichia coli</i>      | NEONIN | UK | 27/01/2011 | ERS6404402 |
| econeo_78 | <i>Escherichia coli</i>      | NEONIN | UK | 02/03/2011 | ERS6404403 |
| econeo_79 | <i>Escherichia coli</i>      | NEONIN | UK | 06/03/2011 | ERS6404404 |
| ecneo_80  | <i>Enterobacter cloacae</i>  | NEONIN | UK | 05/08/2011 | ERS6404405 |
| smaneo_81 | <i>Serratia marcescens</i>   | NEONIN | UK | 25/09/2011 | ERS6404406 |
| econeo_82 | <i>Escherichia coli</i>      | NEONIN | UK | 10/10/2011 | ERS6404407 |
| ecneo_83  | <i>Enterobacter cloacae</i>  | NEONIN | UK | 31/12/2011 | ERS6404411 |
| econeo_84 | <i>Escherichia coli</i>      | NEONIN | UK | 15/02/2012 | ERS6404412 |
| econeo_85 | <i>Escherichia coli</i>      | NEONIN | UK | 10/06/2012 | ERS6404408 |
| econeo_86 | <i>Escherichia coli</i>      | NEONIN | UK | 30/06/2013 | ERS6404409 |
| econeo_87 | <i>Escherichia coli</i>      | NEONIN | UK | 23/08/2012 | ERS6404410 |
